# Supplementary material for: Dihydroisocoumarins and Dihydroisoflavones from the Rhizomes of Dioscorea collettii with Cytotoxic Activity and Structural Revision of 2,2′-Oxybis(1,4-di-tert-butylbenzene)
Source: MDPI journal article supplement (doi:10.3390/molecules26175381), 2021-09-04
Supplement: s1 [file s1]

## Supporting Information

### **Dihydroisocoumarins and dihydroisoflavones from the rhizomes of *Dioscorea collettii* with cytotoxic activity and structural revision of 2, 2'- oxybis (1, 4-di-tert-butylbenzene)**

Songsong Jing <sup>1,2,†</sup>, Zhuo Qu <sup>3,†</sup>, Chengcheng Zhao <sup>2</sup>, Xia Li <sup>2</sup>, Long Guo <sup>1</sup>,  
Zhao Liu <sup>1</sup>, Yuguang Zheng <sup>1,4,\*</sup> and Wen yuan Gao <sup>2,\*</sup>

<sup>1</sup> Traditional Chinese Medicine Processing Technology Innovation Center of Hebei Province, Hebei University of Chinese Medicine, Shijiazhuang 050200, China; johnson3917@163.com (S. J.); guo\_long11@163.com (L.G.); liuzhao\_mbb@126.com (Z. L.)

<sup>2</sup> Tianjin Key Laboratory for Modern Drug Delivery & High-Efficiency, School of Pharmaceutical Science and Technology, Tianjin University, Tianjin 300072, China; zhaochengcheng0122@163.com (C. Z.); lix-ia2008@tju.edu.cn (X. L.)

<sup>3</sup> School of Pharmacy, Ningxia Medical University, Yinchuan 750004, China; quzhuo2008@163.com (Z. Q.)

<sup>4</sup> Hebei Chemical & Pharmaceutical College, Shijiazhuang 050200, China

\* Correspondence: pharmgao@tju.edu.cn (W.G.); zyg314@163.com (Y.Z.); Tel.: +86-022-87401895 (W.G.)

† These authors contributed equally to this work.

## Contents

Figure S1:  $^1\text{H}$ -NMR (600 MHz,  $\text{CD}_3\text{OD}$ ) spectrum of compound **1a/1b**.

Figure S2:  $^{13}\text{C}$ -NMR (150 MHz,  $\text{CD}_3\text{OD}$ ) spectrum of compound **1a/1b**.

Figure S3: HSQC spectrum of compound **1a/1b**.

Figure S4:  $^1\text{H}$ - $^1\text{H}$  COSY spectrum of compound **1a/1b**.

Figure S5: HMBC spectrum of compound **1a/1b**.

Figure S6: HR-ESI-MS spectrum of compound **1a/1b**.

Figure S7: UV spectrum of compound **1a/1b**.

Figure S8 Chiral HPLC separation chromatogram of compound **1**.

Figure S9:  $^1\text{H}$ -NMR (600 MHz,  $\text{CDCl}_3$ ) spectrum of compound **2**.

Figure S10:  $^{13}\text{C}$ -NMR (150 MHz,  $\text{CDCl}_3$ ) spectrum of compound **2**.

Figure S11: HSQC spectrum of compound **2**.

Figure S12:  $^1\text{H}$ - $^1\text{H}$  COSY spectrum of compound **2**.

Figure S13: HMBC spectrum of compound **2**.

Figure S14 (I). The enlarged HMBC spectrum of compound **2** (I).

Figure S14 (II). The enlarged HMBC spectrum of compound **2** (II).

Figure S14 (III). The enlarged HMBC spectrum of compound **2** (III).

Figure S14 (IV). The enlarged HMBC spectrum of compound **2** (IV).

Figure S15. Structures and comparison of chemical shifts between compounds **2**, **2'** and **2,4-DTBP** in CDCl<sub>3</sub>.

Figure S16. <sup>1</sup>H-NMR (600 MHz, C<sub>5</sub>D<sub>5</sub>N) spectrum of compound **3a/3b**.

Figure S17. <sup>13</sup>C-NMR (150 MHz, C<sub>5</sub>D<sub>5</sub>N) spectrum of compound **3a/3b**.

Figure S18. Chiral HPLC separation chromatogram of compound **3**.

Figure S19. <sup>1</sup>H-NMR (600 MHz, C<sub>5</sub>D<sub>5</sub>N) spectrum of compound **4**.

Figure S20. <sup>13</sup>C-NMR (150 MHz, C<sub>5</sub>D<sub>5</sub>N) spectrum of compound **4**.

Figure S21. ECD spectrum of compound **3**

ECD calculation of compound **3**

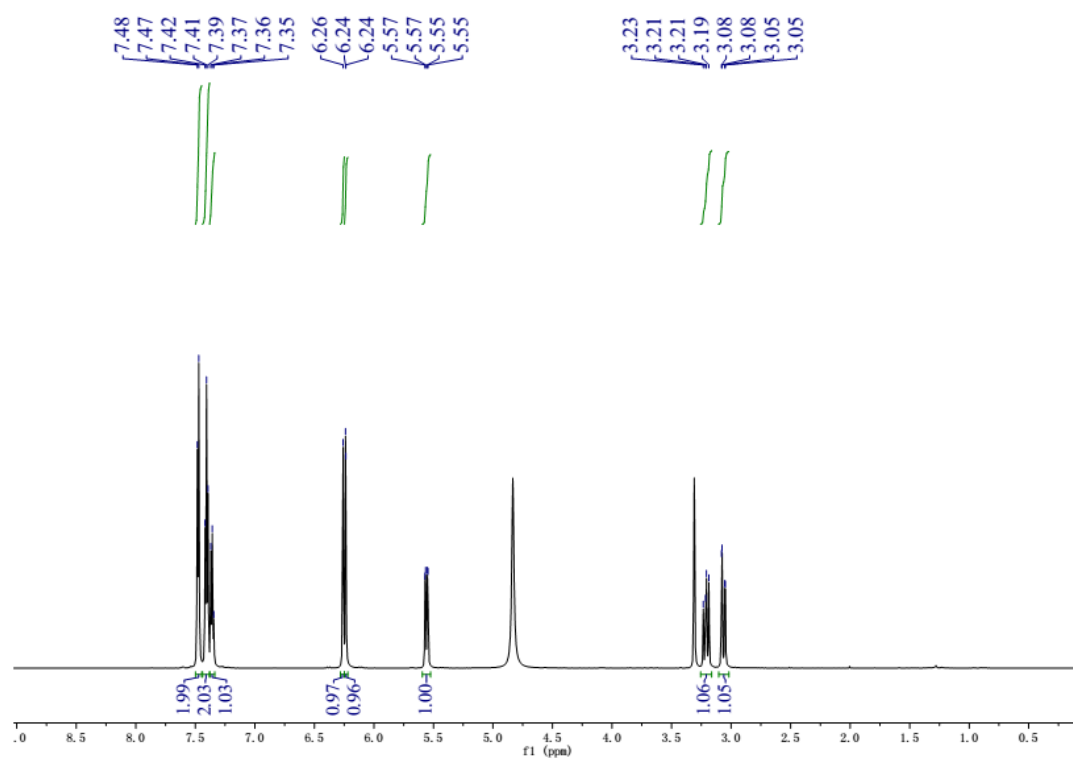

Figure S1. <sup>1</sup>H-NMR (600 MHz, CD<sub>3</sub>OD) spectrum of compound **1a/1b**.

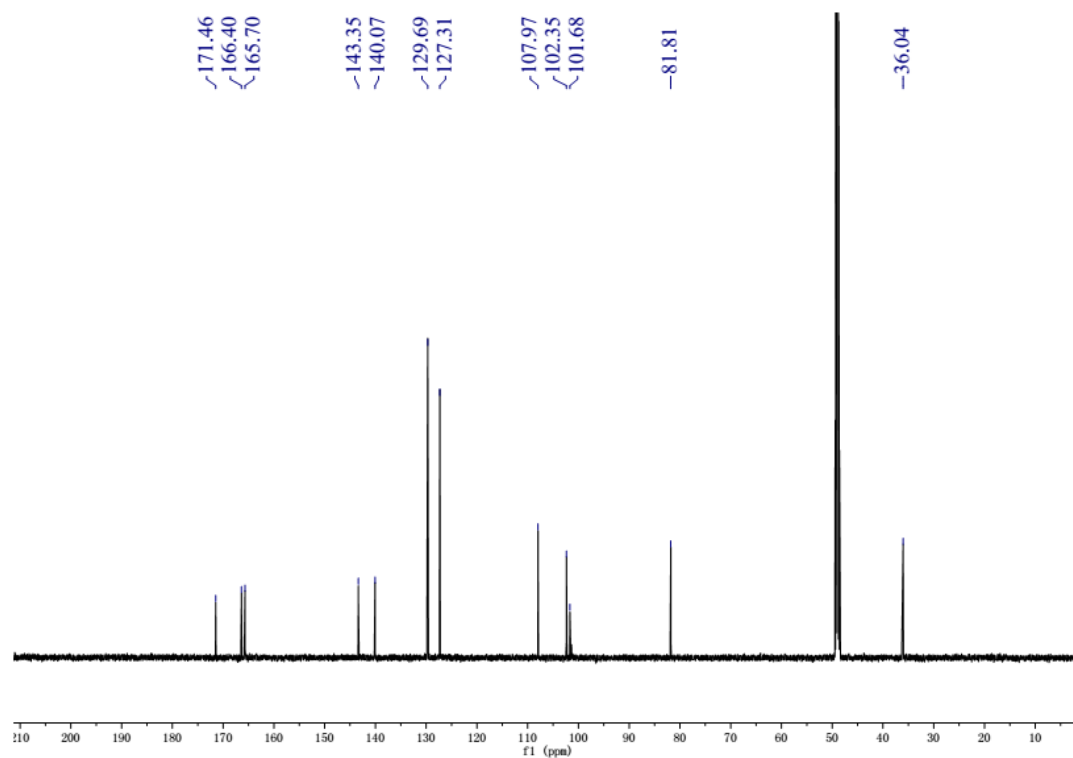

Figure S2. <sup>13</sup>C-NMR (150 MHz, CD<sub>3</sub>OD) spectrum of compound **1a/1b**.

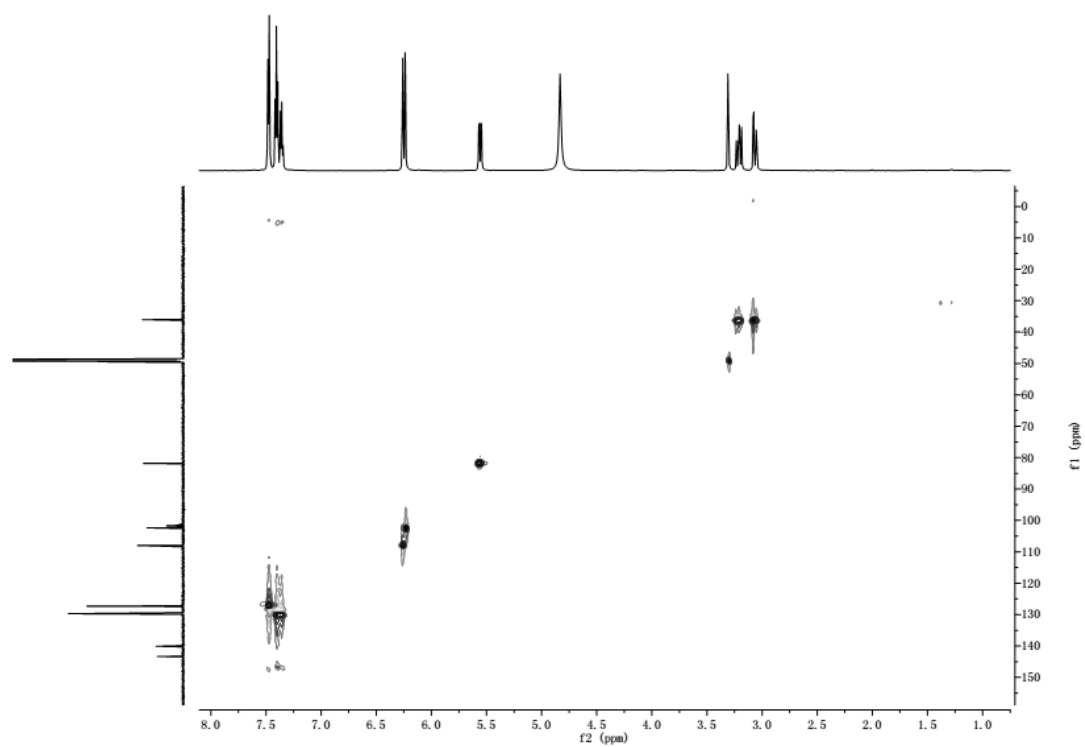

Figure S3. HSQC spectrum of compound **1a/1b**.

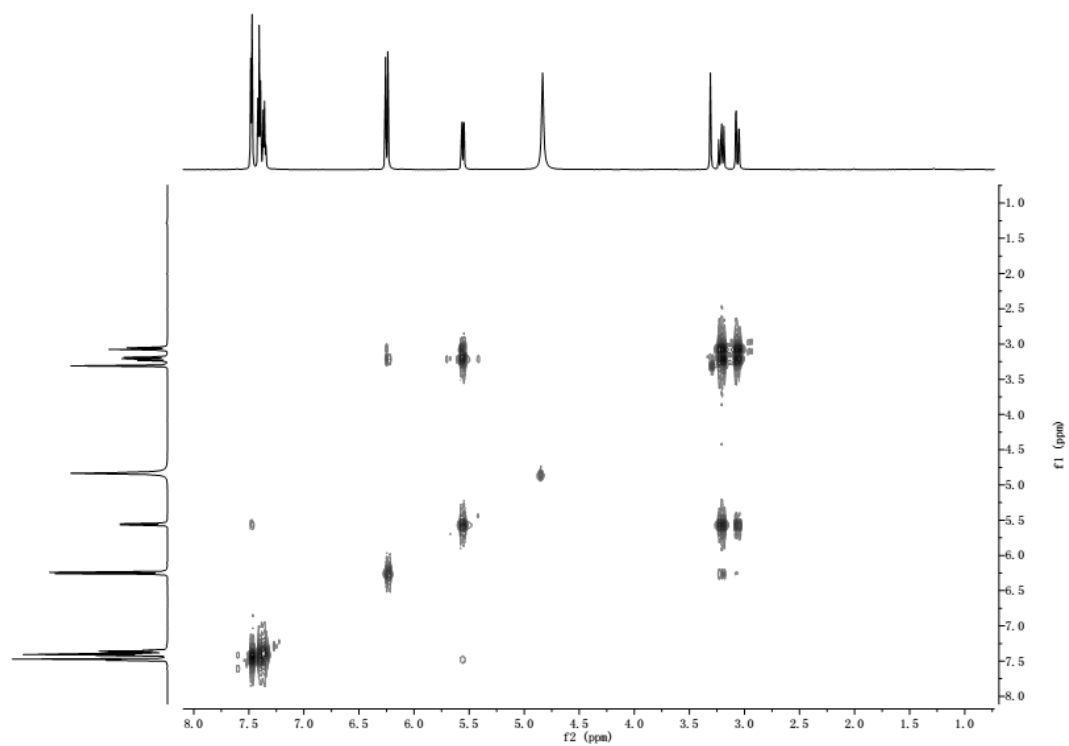

Figure S4.  $^1\text{H}$ - $^1\text{H}$  COSY spectrum of compound **1a/1b**.

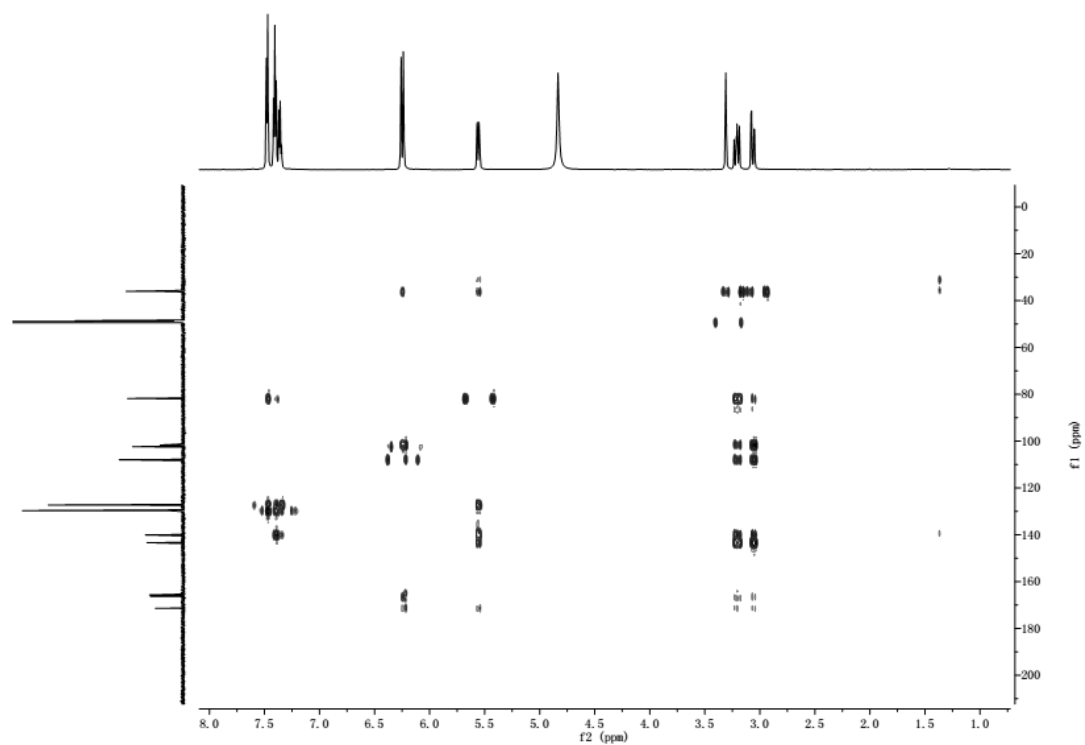

Figure S5. HMBC spectrum of compound **1a/1b**.

# User Spectra

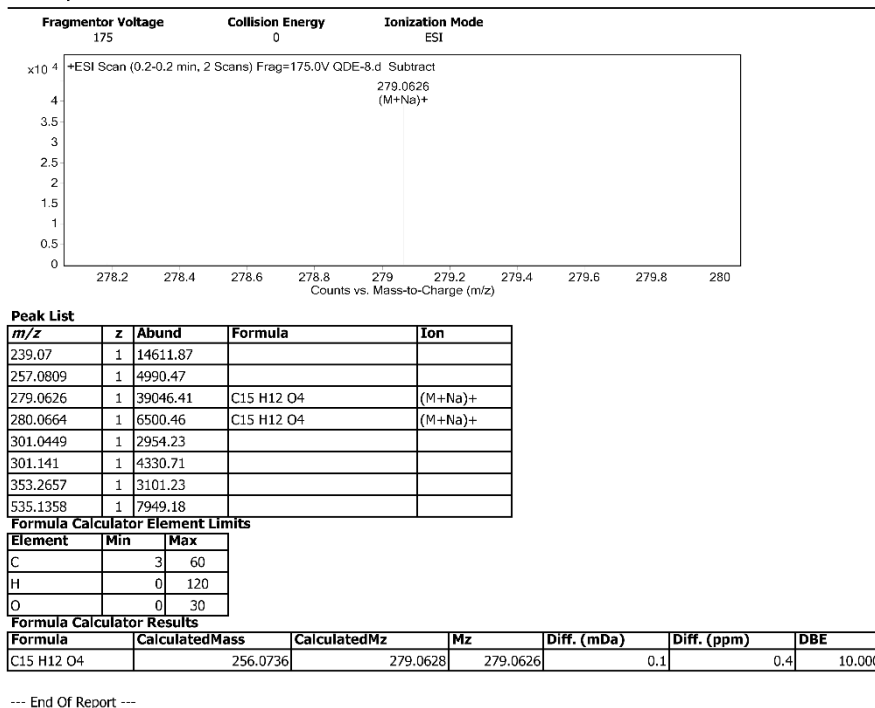

Figure S6. HR-ESI-MS spectrum of compound **1a/1b**.

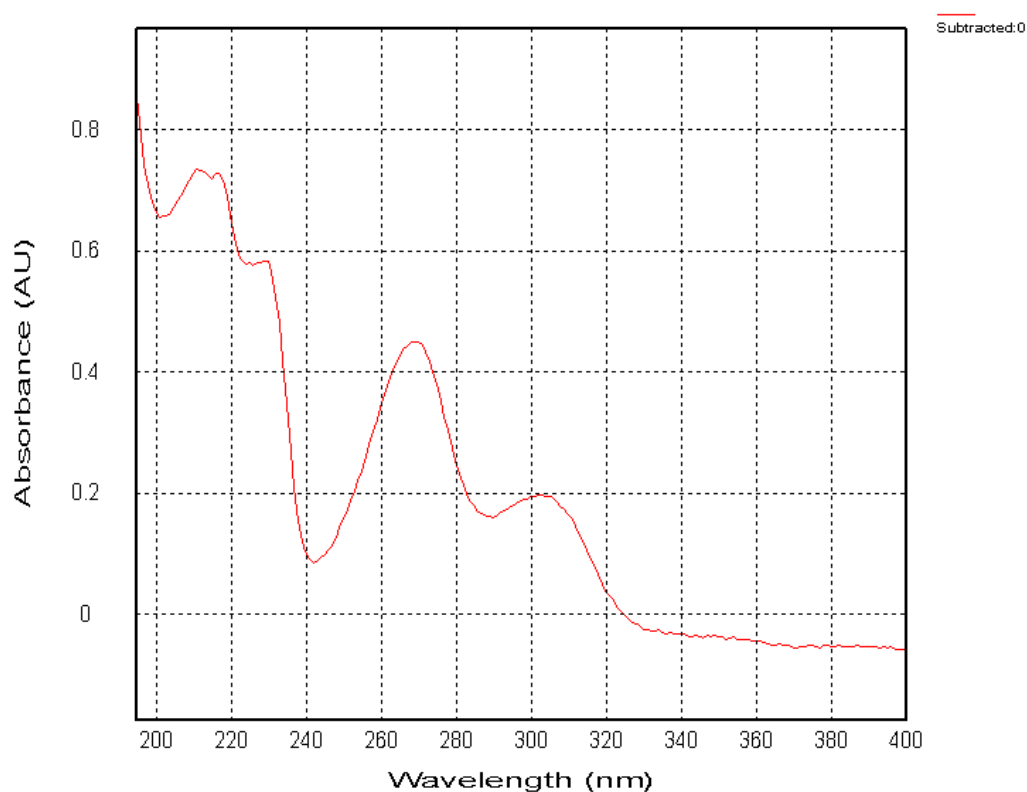

Figure S7. UV spectrum of compound **1a/1b**.

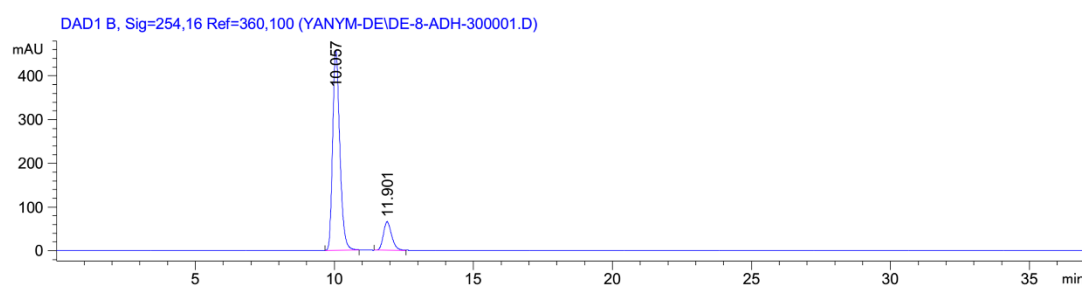

Figure S8. Chiral HPLC separation chromatogram of compound **1**.



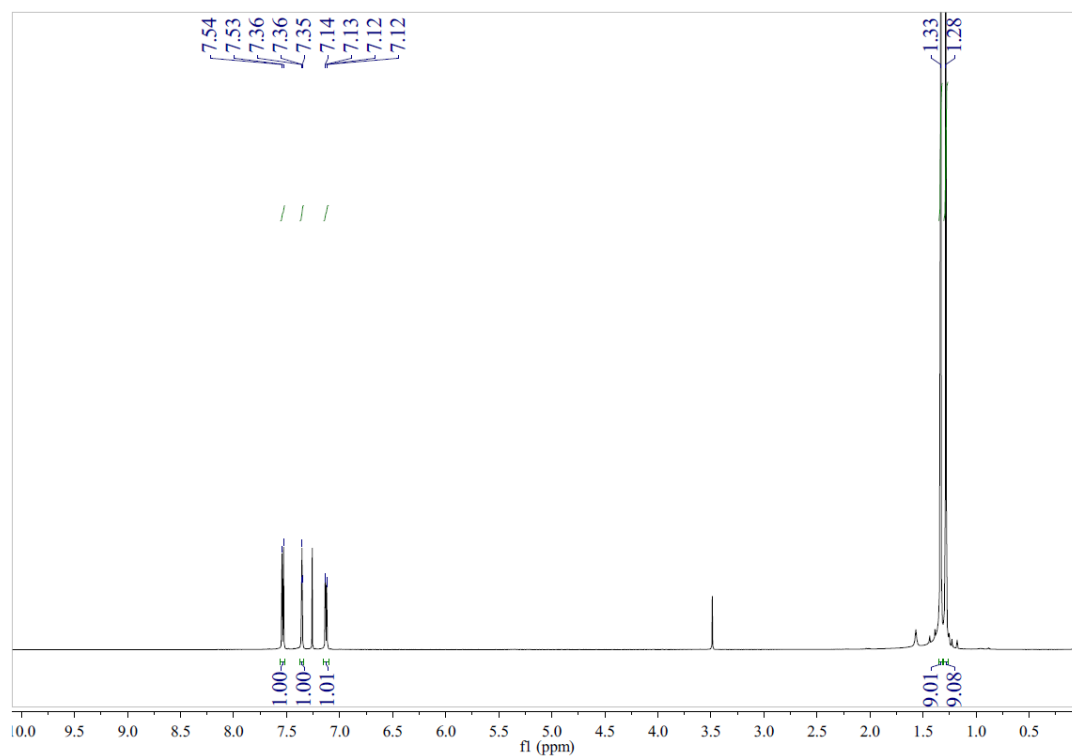

Figure S9. <sup>1</sup>H-NMR (600 MHz, CDCl<sub>3</sub>) spectrum of compound 2.

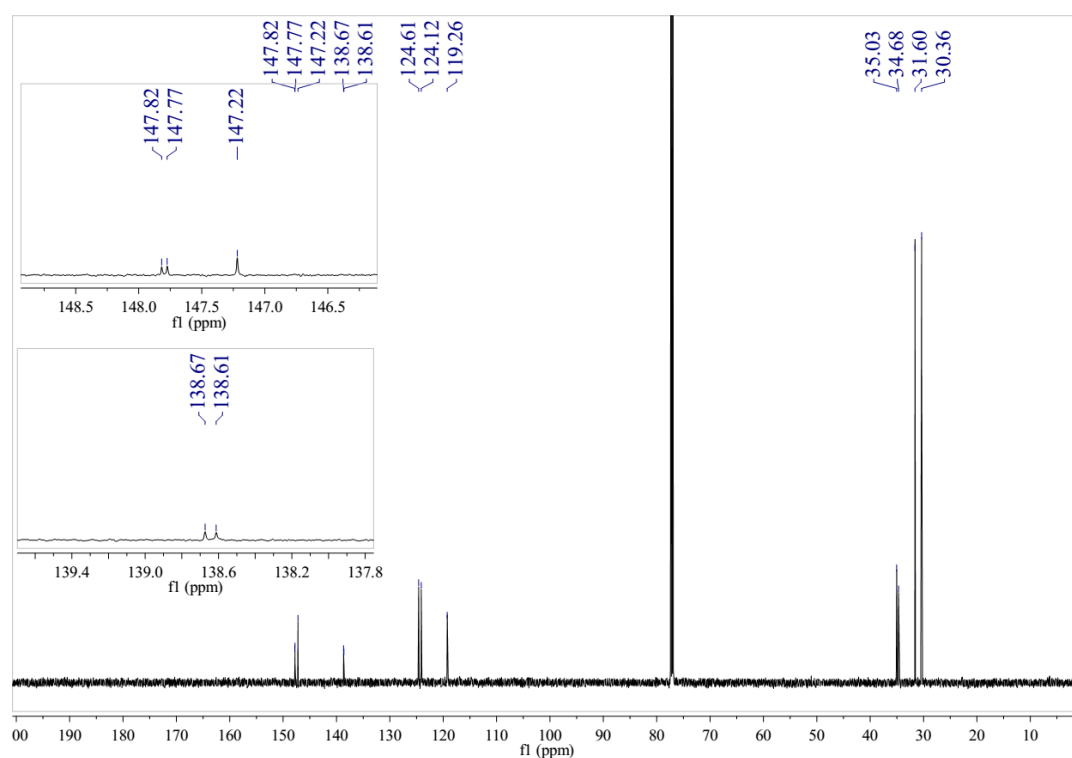

Figure S10. <sup>13</sup>C-NMR (150 MHz, CDCl<sub>3</sub>) spectrum of compound 2.

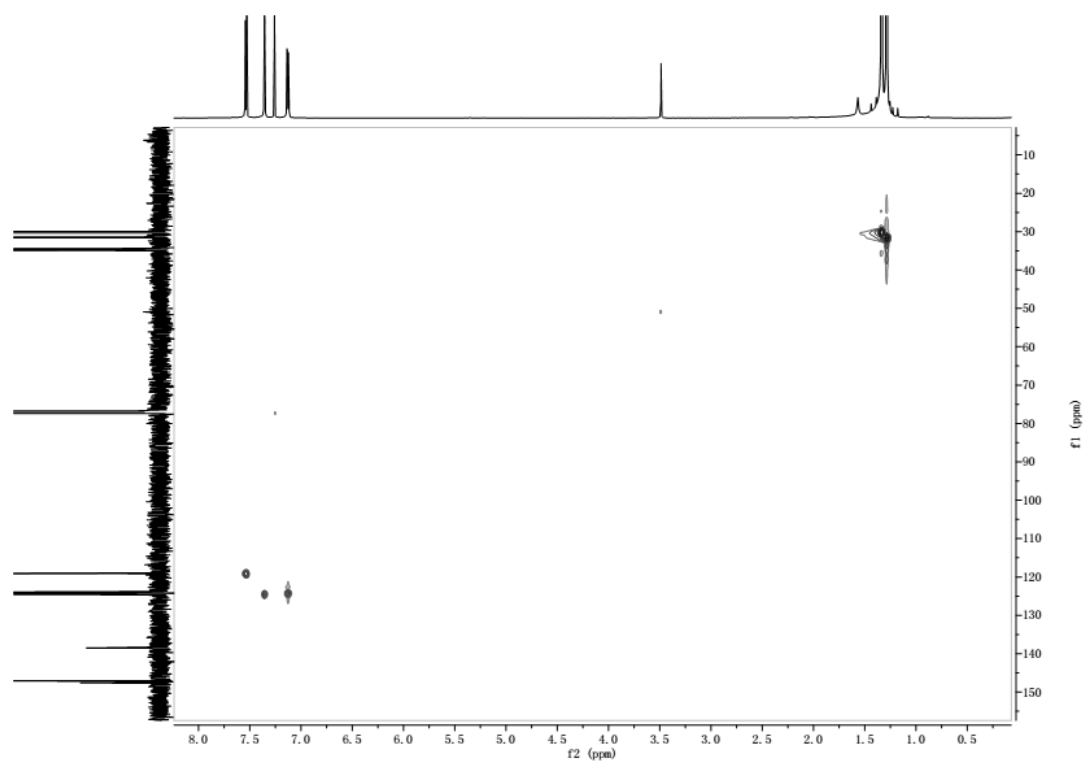

Figure S11. HSQC spectrum of compound 2.

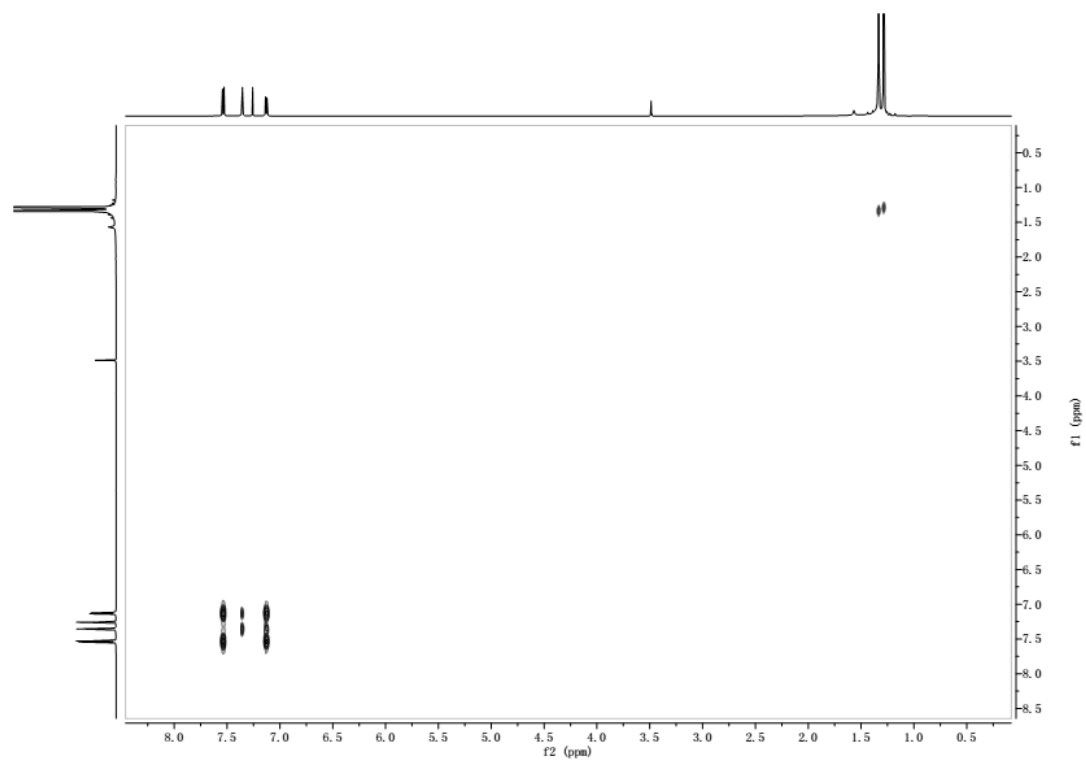

Figure S12.  $^1\text{H}$ - $^1\text{H}$  COSY spectrum of compound 2.

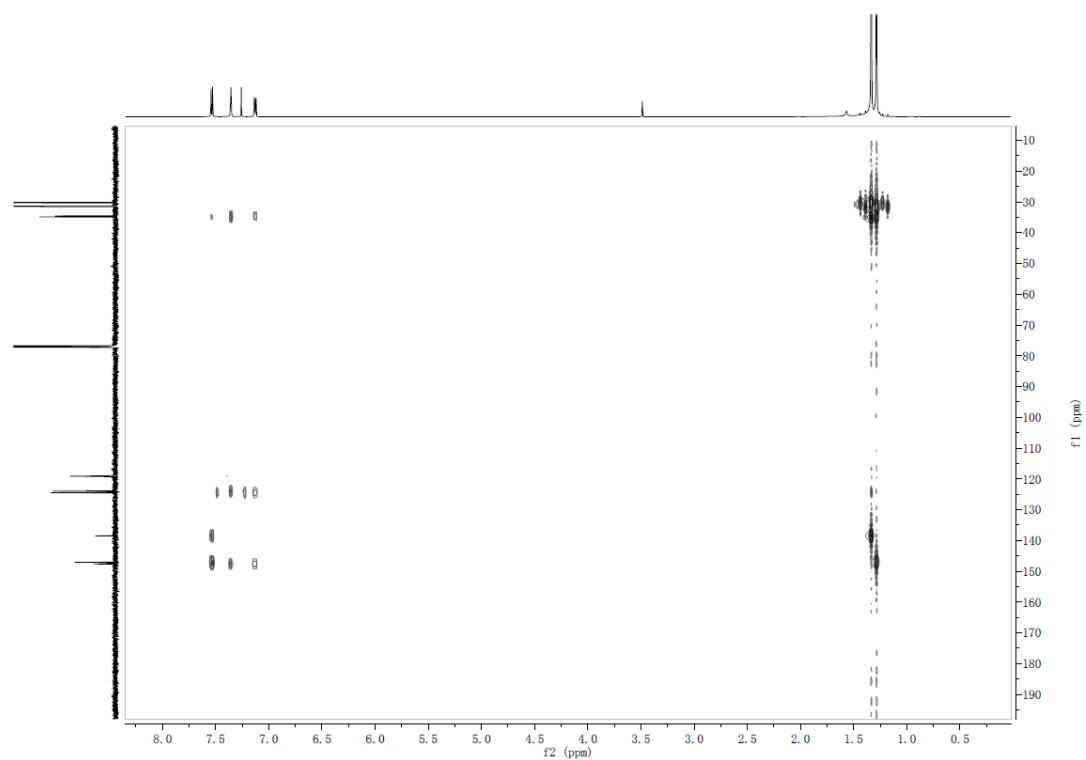

Figure S13. HMBC spectrum of compound **2**.

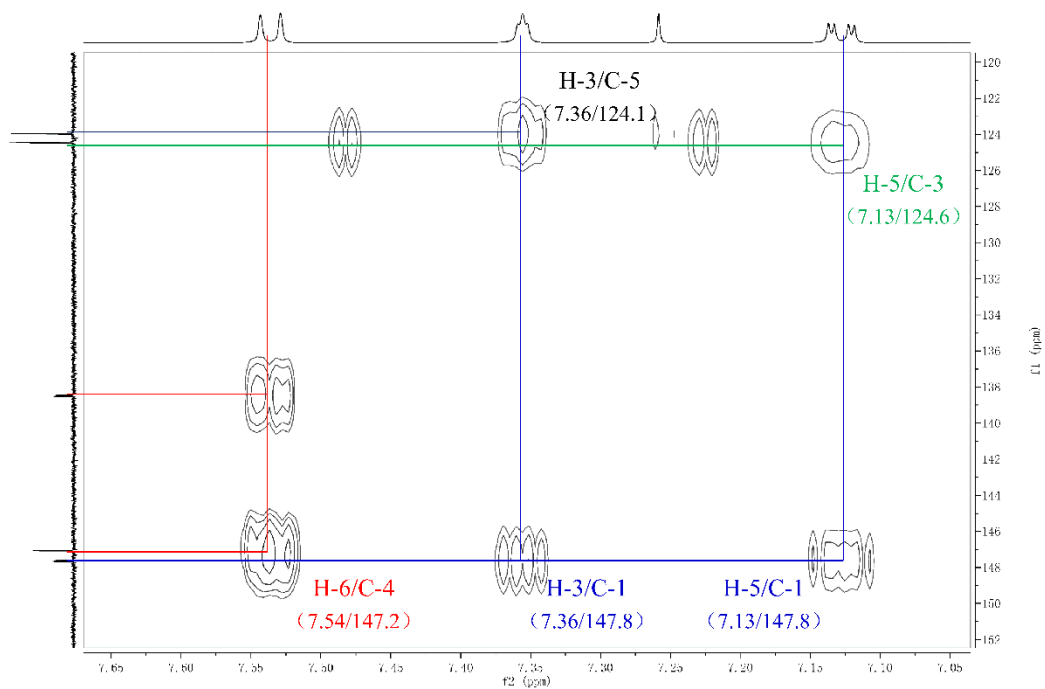

Figure S14 (I). The enlarged HMBC spectrum of compound 2 (I)

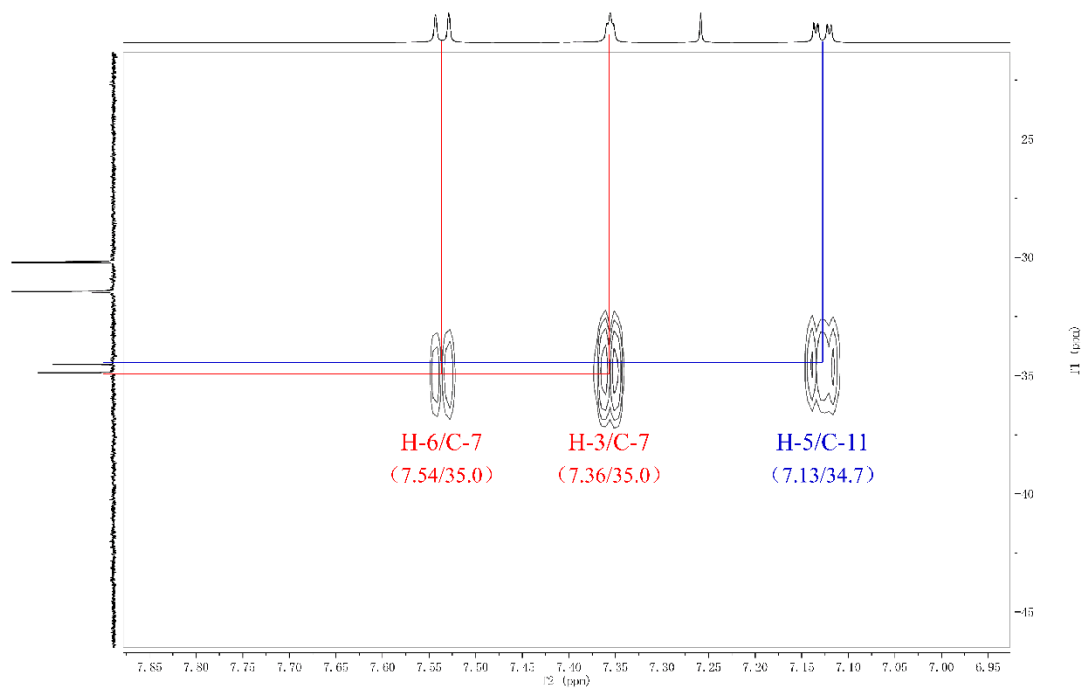

Figure S14 (II). The enlarged HMBC spectrum of compound **2** (II)

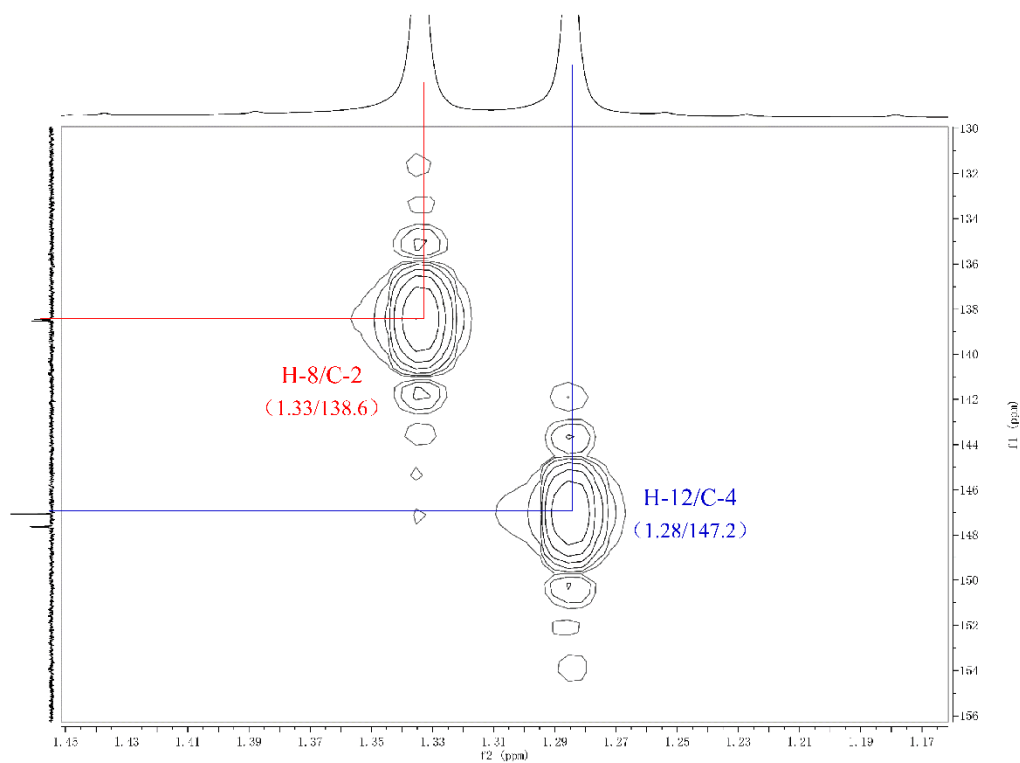

Figure S14 (III). The enlarged HMBC spectrum of compound **2** (III)

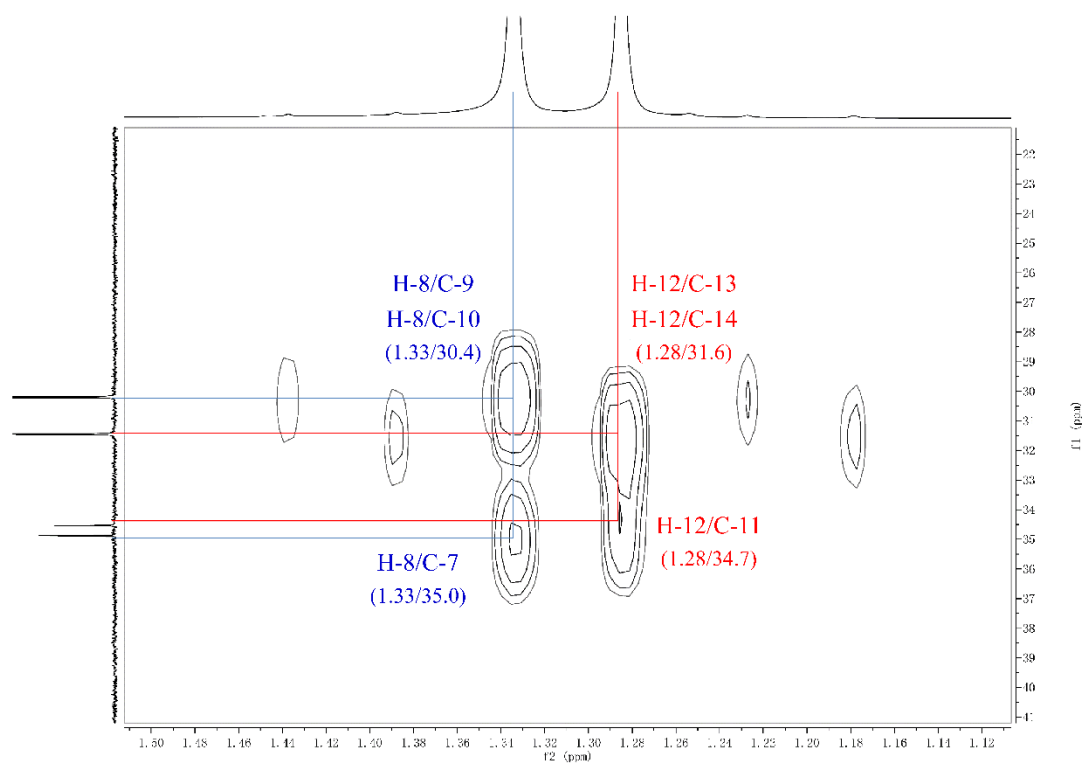

Figure S14 (IV). The enlarged HMBC spectrum of compound 2 (IV)



| No.                    | <b>2</b> <sup>a)</sup>                       |                       | <b>2,4-DTBP</b> <sup>b)</sup>                |                     | No.                    | <b>2'</b> <sup>c)</sup>                      |                     |
|------------------------|----------------------------------------------|-----------------------|----------------------------------------------|---------------------|------------------------|----------------------------------------------|---------------------|
|                        | $\delta_{\text{H}}$ , mult ( <i>J</i> in Hz) | $\delta_{\text{C}}$   | $\delta_{\text{H}}$ , mult ( <i>J</i> in Hz) | $\delta_{\text{C}}$ |                        | $\delta_{\text{H}}$ , mult ( <i>J</i> in Hz) | $\delta_{\text{C}}$ |
| 1 (1')                 |                                              | 147.8 (147.8), C      |                                              | 152.0               | 2 (2')                 |                                              | 147.6 (147.7)       |
| 2 (2')                 |                                              | 138.6 (138.7), C      |                                              | 135.3               | 4 (4')                 |                                              | 138.5 (138.5)       |
| 3 (3')                 | 7.36, t (2.5)                                | 124.6, CH             | 7.30, br s                                   | 124.2               | 3 (3')                 | 7.36, d (2.5)                                | 124.5               |
| 4 (4')                 |                                              | 147.2, C              |                                              | 143.1               | 1 (1')                 |                                              | 147.1               |
| 5 (5')                 | 7.13, dd (8.6, 2.5)                          | 124.1, CH             | 7.08, d (8.2)                                | 123.7               | 5 (5')                 | 7.13, dd (8.7, 2.5)                          | 123.0               |
| 6 (6')                 | 7.54, d (8.6)                                | 119.3, CH             | 6.6, d (8.2)                                 | 116.1               | 6 (6')                 | 7.54, d (8.7)                                | 119.1               |
| 7 (7')                 |                                              | 35.0, C               |                                              | 34.9                | 7 (7')                 |                                              | 34.9                |
| 8/9/10 (8'/9'/10')     | 1.33, s                                      | 30.4, CH <sub>3</sub> | 1.42, s                                      | 29.8                | 12/13/14 (12'/13'/14') | 1.29, s                                      | 30.2                |
| 11 (11')               |                                              | 34.7, C               |                                              | 34.4                | 11 (11')               |                                              | 34.5                |
| 12/13/14 (12'/13'/14') | 1.28, s                                      | 31.6, CH <sub>3</sub> | 1.30, s                                      | 31.8                | 8/9/10 (8'/9'/10')     | 1.33, s                                      | 31.4                |

<sup>a)</sup> compounds **2**, **2'**, and **2,4-DTBP**, all measured in CDCl<sub>3</sub>  
<sup>b)</sup> **2,4-DTBP**, Journal of Chinese Medicinal Materials, **2019**, 07, 1541-1545;  
Journal of Ocean University of Qingdao, **1999**, 29(1): 53-56.  
<sup>c)</sup> **2'**, Natural Product Research And Development, **2014**, 26(7): 987-989.

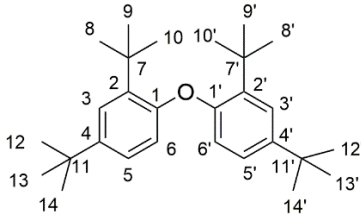

**2 revised**



**2,4-DTBP**



**2' originally proposed**

Figure S15. Structures and comparison of chemical shifts between compounds **2**, **2'**, and **2,4-DTBP** in CDCl<sub>3</sub>



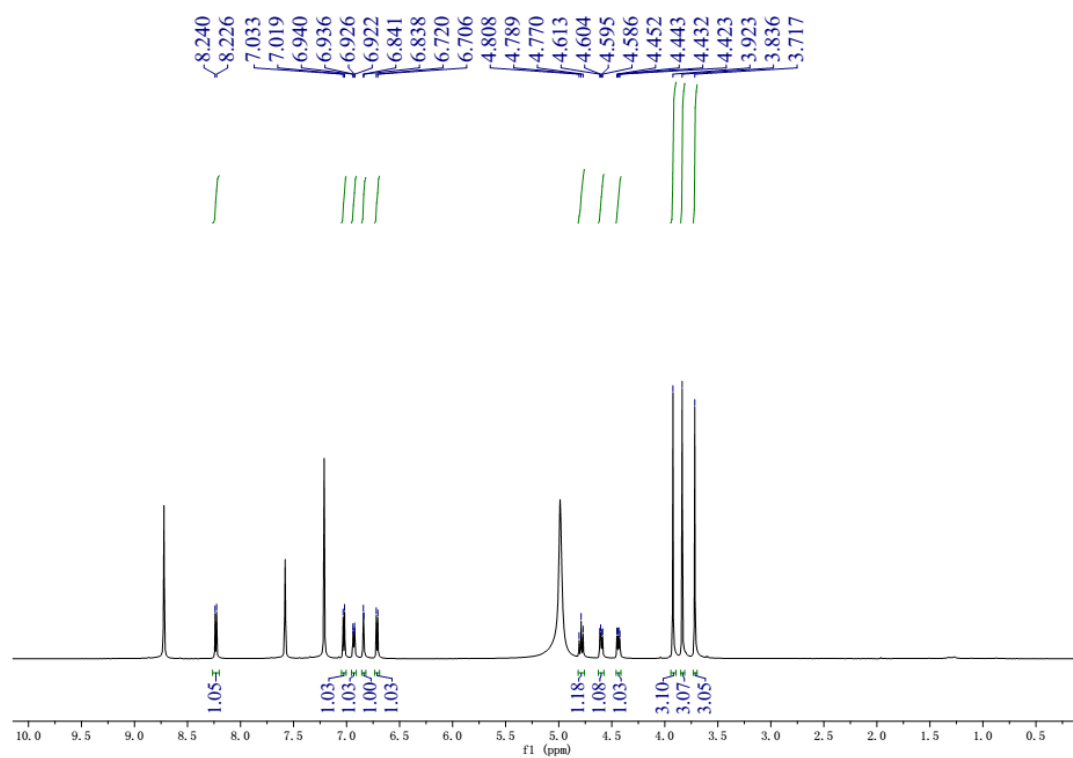

Figure S16.  $^1\text{H}$ -NMR (600 MHz,  $\text{C}_5\text{D}_5\text{N}$ ) spectrum of compound **3a/3b**.

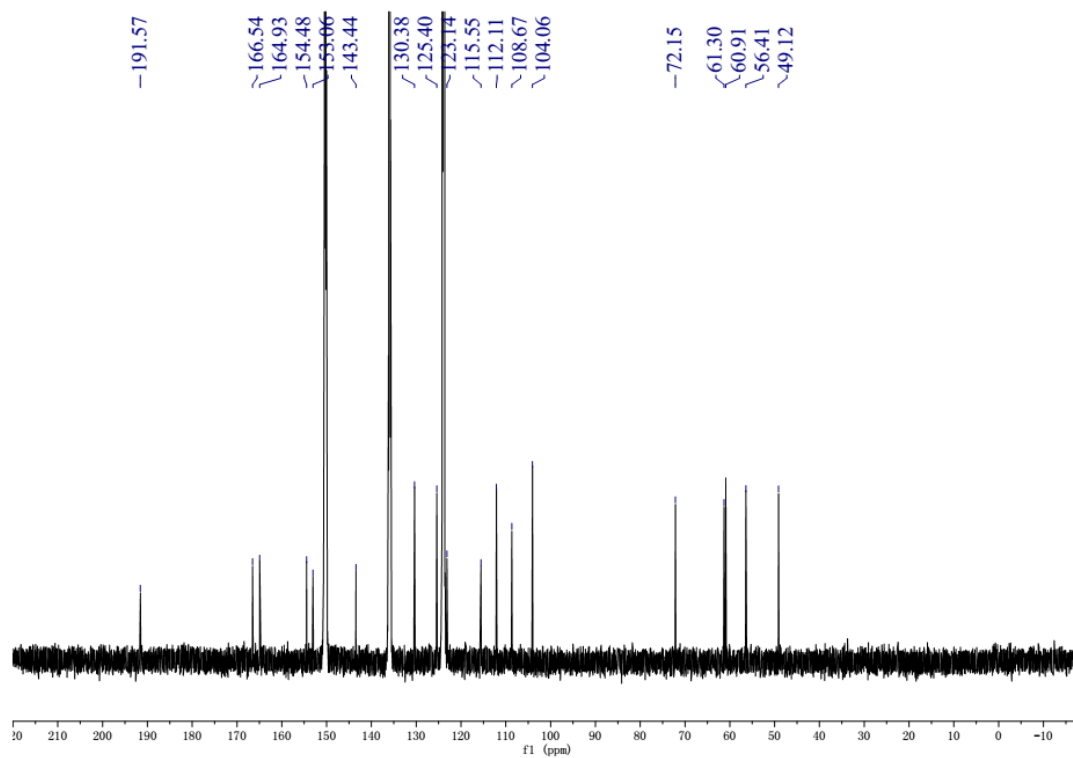

Figure S17. <sup>13</sup>C-NMR (150 MHz, C<sub>5</sub>D<sub>5</sub>N) spectrum of compound 3a/3b.

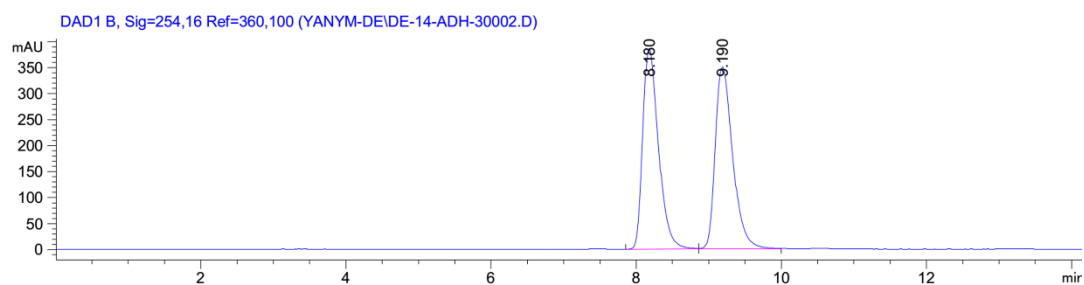

Figure S18. Chiral HPLC separation chromatogram of compound 3

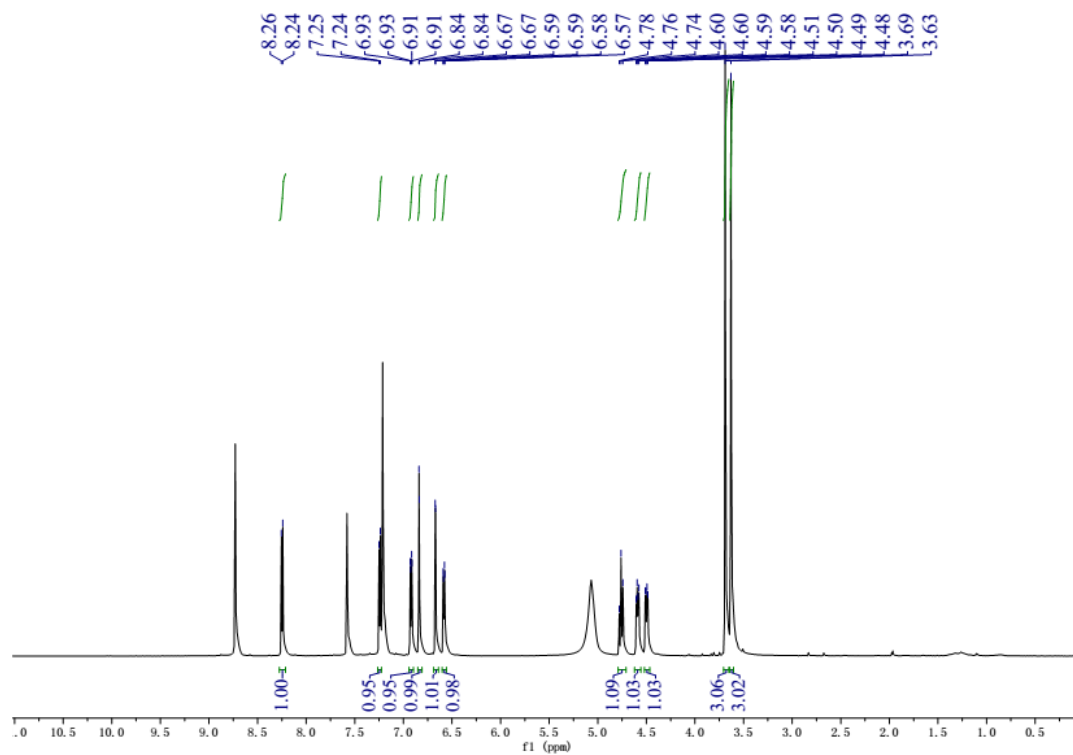

Figure S19. <sup>1</sup>H-NMR (600 MHz, C<sub>5</sub>D<sub>5</sub>N) spectrum of compound 4.

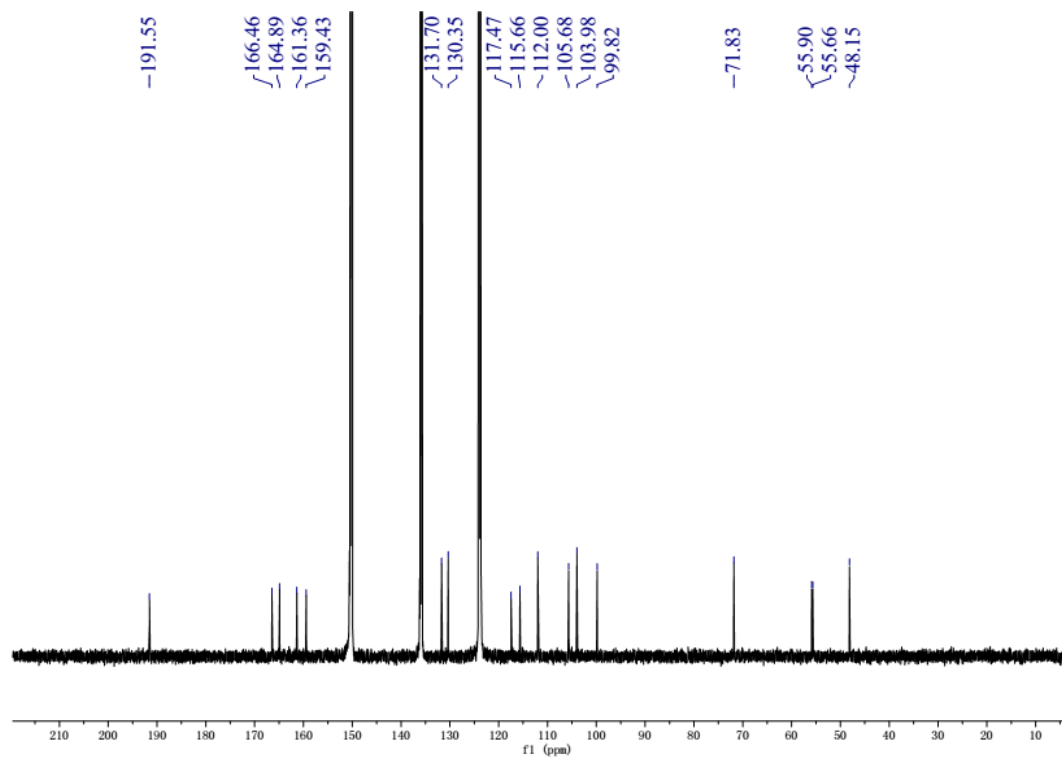

Figure S20.  $^{13}\text{C}$ -NMR (150 MHz,  $\text{C}_5\text{D}_5\text{N}$ ) spectrum of compound 4.

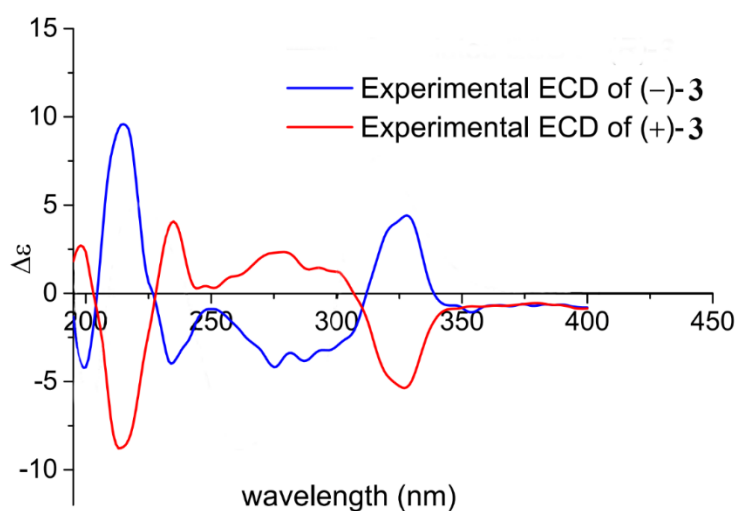

Figure S21. ECD spectrum of compound 3

### ECD calculation of compound 3

#### Computational methods

MMFF94 conformational search generated low-energy conformers within a 10 kcal/mol energy window were performed with CONFLEX.<sup>1,2</sup> Selected 2 most highest distribution conformers were further optimized by the density functional theory method at the B3LYP/6-31+g(d,p) level. The ECD calculations

was using TD-DFT-B3LYP/6-31+g(d,p) of theory on optimized geometries through the CPCM model (in MeOH). The calculated ECD curves were generated using SpecDis 1.61<sup>3</sup> with  $\sigma=0.30$  eV, UV shift -10 nm. All the above calculations were carried out with the Gaussian 09 package of programs.<sup>4</sup>

## References

- (1) Goto, H.; Osawa, E.; J. Am. Chem. Soc. 1989, 111, 8950–8951.
- (2) Goto, H.; Osawa, E.; J. Chem. Soc., Perkin Trans. 2, 1993, 187–198.
- (3) Bruhn T.; Schaumlöffel A.; Hemberger Y.; Bringmann G.; *SpecDis*, version 1.61, University of Wuerzburg, Germany, **2013**.
- (4) Frisch, M. J.; Trucks, G. W.; Schlegel, H. B.; Scuseria, G. E.; Robb, M. A.; Cheeseman, J. R.; Scalmani, G.; Barone, V.; Mennucci, B.; Petersson, G. A.; Nakatsuji, H.; Caricato, M.; Li, X.; Hratchian, H. P.; Izmaylov, A. F.; Bloino, J.; Zheng, G.; Sonnenberg, J. L.; Hada, M.; Ehara, M.; Toyota, K.; Fukuda, R.; Hasegawa, J.; Ishida, M.; Nakajima, T.; Honda, Y.; Kitao, O.; Nakai, H.; Vreven, T.; Montgomery, J. A.; Peralta, J. E.; Ogliaro, F.; Bearpark, M.; Heyd, J. J.; Brothers, E.; Kudin, K. N.; Staroverov, V. N.; Keith, T.; Kobayashi, R.; Normand, J.; Raghavachari, K.; Rendell, A.; Burant, J. C.; Iyengar, S. S.; Tomasi, J.; Cossi, M.; Rega, N.; Millam, J. M.; Klene, M.; Knox, J. E.; Cross, J. B.; Bakken, V.; Adamo, C.; Jaramillo, J.; Gomperts, R.; Stratmann, R. E.; Yazyev, O.; Austin, A. J.; Cammi, R.; Pomelli, C.; Ochterski, J. W.; Martin, R. L.; Morokuma, K.; Zakrzewski, V. G.; Voth, G. A.; Salvador, P.; Dannenberg, J. J.; Dapprich, S.; Daniels, A. D.; Farkas, O.; Foresman, J. B.; Ortiz, J. V.; Cioslowski, J.; Fox, D. J.

Gaussian 09, revision C.01. Gaussian, Inc.: Wallingford CT, 2010.

### Coordinates of computations (R)-3

#### Conformer 1

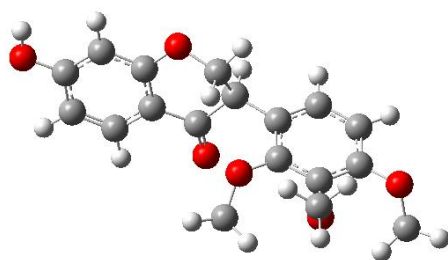

Standard orientation:

| Center<br>Number | Atomic<br>Number | Atomic<br>Type | Coordinates (Angstroms) |           |           |
|------------------|------------------|----------------|-------------------------|-----------|-----------|
|                  |                  |                | X                       | Y         | Z         |
| 1                | 6                | 0              | 5.366836                | 0.299100  | 0.070293  |
| 2                | 6                | 0              | 4.855214                | 0.876661  | -1.109917 |
| 3                | 6                | 0              | 3.520746                | 0.695089  | -1.420807 |
| 4                | 6                | 0              | 2.657795                | -0.045064 | -0.584106 |
| 5                | 6                | 0              | 3.193468                | -0.597480 | 0.601542  |
| 6                | 6                | 0              | 4.544021                | -0.434792 | 0.925734  |
| 7                | 6                | 0              | 1.268833                | -0.317238 | -0.981097 |
| 8                | 6                | 0              | 0.480166                | -1.228821 | -0.032839 |
| 9                | 6                | 0              | 1.017340                | -1.100706 | 1.399586  |
| 10               | 8                | 0              | 2.441024                | -1.330678 | 1.463931  |
| 11               | 8                | 0              | 0.790300                | 0.080473  | -2.043673 |
| 12               | 8                | 0              | 6.686479                | 0.503823  | 0.330057  |
| 13               | 6                | 0              | -1.023005               | -1.047529 | -0.085305 |
| 14               | 6                | 0              | -1.857639               | -2.138776 | -0.353070 |
| 15               | 6                | 0              | -3.246449               | -2.006028 | -0.378855 |
| 16               | 6                | 0              | -3.831625               | -0.770028 | -0.102047 |
| 17               | 6                | 0              | -3.018398               | 0.338560  | 0.199558  |
| 18               | 6                | 0              | -1.616816               | 0.203446  | 0.173190  |
| 19               | 8                | 0              | -0.797116               | 1.265467  | 0.482051  |
| 20               | 6                | 0              | -0.862229               | 2.416606  | -0.389261 |
| 21               | 8                | 0              | -3.607018               | 1.547371  | 0.497907  |

|    |   |   |           |           |           |
|----|---|---|-----------|-----------|-----------|
| 22 | 6 | 0 | -3.662957 | 1.852424  | 1.906003  |
| 23 | 8 | 0 | -5.204015 | -0.673971 | -0.046807 |
| 24 | 6 | 0 | -5.815548 | 0.090236  | -1.103957 |
| 25 | 1 | 0 | 5.516985  | 1.444925  | -1.754197 |
| 26 | 1 | 0 | 3.109806  | 1.114015  | -2.333391 |
| 27 | 1 | 0 | 4.926502  | -0.870228 | 1.843716  |
| 28 | 1 | 0 | 0.707141  | -2.249249 | -0.375750 |
| 29 | 1 | 0 | 0.809776  | -0.103628 | 1.801238  |
| 30 | 1 | 0 | 0.574673  | -1.854501 | 2.051172  |
| 31 | 1 | 0 | 6.946563  | 0.070940  | 1.156668  |
| 32 | 1 | 0 | -1.412285 | -3.108054 | -0.558006 |
| 33 | 1 | 0 | -3.886840 | -2.853761 | -0.599551 |
| 34 | 1 | 0 | -0.626820 | 2.117831  | -1.414782 |
| 35 | 1 | 0 | -1.846557 | 2.886090  | -0.343863 |
| 36 | 1 | 0 | -0.100175 | 3.105234  | -0.021757 |
| 37 | 1 | 0 | -4.244432 | 1.092219  | 2.438427  |
| 38 | 1 | 0 | -2.655719 | 1.916338  | 2.329548  |
| 39 | 1 | 0 | -4.160019 | 2.820126  | 1.987324  |
| 40 | 1 | 0 | -6.889535 | 0.063532  | -0.913724 |
| 41 | 1 | 0 | -5.461776 | 1.124504  | -1.092999 |
| 42 | 1 | 0 | -5.603039 | -0.370181 | -2.075666 |

-----

Conformer 2

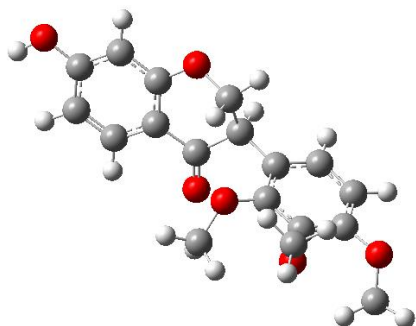

Standard orientation:

| Center<br>Number | Atomic<br>Number | Atomic<br>Type | Coordinates (Angstroms) |           |           |
|------------------|------------------|----------------|-------------------------|-----------|-----------|
|                  |                  |                | X                       | Y         | Z         |
| 1                | 6                | 0              | 5.368445                | 0.285590  | 0.087946  |
| 2                | 6                | 0              | 4.861560                | 0.871867  | -1.090176 |
| 3                | 6                | 0              | 3.525460                | 0.695417  | -1.405319 |
| 4                | 6                | 0              | 2.660476                | -0.046437 | -0.575443 |
| 5                | 6                | 0              | 3.193020                | -0.606540 | 0.610156  |
| 6                | 6                | 0              | 4.541067                | -0.449426 | 0.937435  |
| 7                | 6                | 0              | 1.271253                | -0.312654 | -0.977599 |
| 8                | 6                | 0              | 0.478636                | -1.227213 | -0.035826 |
| 9                | 6                | 0              | 1.012389                | -1.106152 | 1.398638  |
| 10               | 8                | 0              | 2.434461                | -1.342220 | 1.465769  |
| 11               | 8                | 0              | 0.796446                | 0.092229  | -2.038999 |
| 12               | 8                | 0              | 6.672480                | 0.414409  | 0.455013  |
| 13               | 6                | 0              | -1.024277               | -1.045148 | -0.091059 |
| 14               | 6                | 0              | -1.858513               | -2.135753 | -0.362740 |
| 15               | 6                | 0              | -3.247335               | -2.003352 | -0.388516 |
| 16               | 6                | 0              | -3.832925               | -0.768417 | -0.107863 |
| 17               | 6                | 0              | -3.020135               | 0.339544  | 0.197127  |
| 18               | 6                | 0              | -1.618486               | 0.204845  | 0.171074  |
| 19               | 8                | 0              | -0.799256               | 1.266069  | 0.484068  |
| 20               | 6                | 0              | -0.863417               | 2.419366  | -0.384323 |
| 21               | 8                | 0              | -3.609264               | 1.547262  | 0.498850  |
| 22               | 6                | 0              | -3.665174               | 1.848522  | 1.907756  |
| 23               | 8                | 0              | -5.205353               | -0.673097 | -0.051952 |
| 24               | 6                | 0              | -5.817691               | 0.092829  | -1.107293 |
| 25               | 1                | 0              | 5.516177                | 1.445864  | -1.739437 |
| 26               | 1                | 0              | 3.118715                | 1.120598  | -2.316905 |
| 27               | 1                | 0              | 4.934463                | -0.884195 | 1.849376  |
| 28               | 1                | 0              | 0.705995                | -2.246366 | -0.382334 |
| 29               | 1                | 0              | 0.807037                | -0.109768 | 1.803316  |
| 30               | 1                | 0              | 0.564630                | -1.860532 | 2.046069  |



|    |   |   |           |           |           |
|----|---|---|-----------|-----------|-----------|
| 31 | 1 | 0 | 7.155745  | 0.950617  | -0.190675 |
| 32 | 1 | 0 | -1.412777 | -3.104320 | -0.570202 |
| 33 | 1 | 0 | -3.887419 | -2.850640 | -0.611785 |
| 34 | 1 | 0 | -0.102994 | 3.107867  | -0.013210 |
| 35 | 1 | 0 | -0.625211 | 2.123528  | -1.410069 |
| 36 | 1 | 0 | -1.848337 | 2.887753  | -0.340124 |
| 37 | 1 | 0 | -4.246117 | 1.086544  | 2.438226  |
| 38 | 1 | 0 | -2.657925 | 1.911903  | 2.331345  |
| 39 | 1 | 0 | -4.162825 | 2.815695  | 1.991747  |
| 40 | 1 | 0 | -6.891524 | 0.065833  | -0.916249 |
| 41 | 1 | 0 | -5.463862 | 1.127070  | -1.094965 |
| 42 | 1 | 0 | -5.605998 | -0.365979 | -2.079961 |

-----
